# Supplementary material for: Templated fabrication of hierarchically porous metal–organic frameworks and simulation of crystal growth
Source: PubMed Central journal article supplement (PMC9473183; doi:10.1039/c8na00262b), 2018-12-12
Supplement: NA-001-C8NA00262B-s001.pdf [file NA-001-C8NA00262B-s001.pdf]

## Electronic Supplementary Information (ESI)

### Templating fabrication of hierarchically porous metal–organic frameworks and simulation of crystal growth

Chongxiong Duan,<sup>a</sup> Hang Zhang,<sup>a</sup> Minhui Yang,<sup>a</sup> Feier Li,<sup>a</sup> Yi Yu,<sup>a</sup> Jing Xiao,<sup>a</sup> Hongxia Xi\*<sup>a, b</sup>

<sup>a</sup>School of Chemistry and Chemical Engineering, South China University of Technology, Guangzhou 510640, China.

<sup>b</sup>Guangdong Provincial Key Laboratory of Atmospheric Environment and Pollution Control, South China University of Technology, Guangzhou Higher Education Mega Centre, Guangzhou 510006, PR China.

#### Experimental section

**Chemicals.** Copper nitrate trihydrate ( $\text{Cu}(\text{NO}_3)_2 \cdot 3\text{H}_2\text{O}$ ), 1,3,5-benzenetricarboxylic acid ( $\text{H}_3\text{BTC}$ ), zinc acetate dihydrate ( $\text{Zn}(\text{CH}_3\text{CO}_2)_2 \cdot 2\text{H}_2\text{O}$ ), 2-methylimidazole (2Im), zinc oxide (ZnO), *N,N*-dimethyloctylamine (DMOA), *N,N*-dimethyldodecylamine (DMDA), and *N,N*-dimethylformamide (DMF), above chemicals were purchased from J&K or aladdin Chemical Ltd, and utilized without further purification.

#### Solvothermal synthesis of conventional Cu-BTC

The conventional microporous Cu-BTC was prepared according to the procedures reported,<sup>1</sup> and the obtained product is denoted as C-Cu-BTC.

#### Rapid room-temperature synthesis of hierarchically porous Cu-BTC with *N,N*-dimethyldodecylamine as template

The experimental procedures are similar to the synthesis of H-Cu-BTC, except the *N,N*-dimethyloctylamine (DMOA) was replaced by *N,N*-dimethyldodecylamine (DMDA). The resulting product is denoted as H-Cu-BTC\_A.

#### Rapid synthesis of hierarchically porous ZIF-8 under facile conditions

The experimental procedures are similar to the previously reported methods,<sup>2, 3</sup> firstly, 5 mmol of zinc oxide (ZnO) was added to 10 mL of deionized water as solution A, and 5 mmol of zinc acetate dihydrate ( $\text{Zn}(\text{CH}_3\text{CO}_2)_2 \cdot 2\text{H}_2\text{O}$ ) was added to 5 mL of *N,N*-dimethylformamide (DMF) as solution B. After that, two solutions were mixed under fast magnetic stirring (denoted as solution C), and continue stirring for 16 h. The formation of gel-like viscous fluid indicates that the

formation of (Zn, Zn) hydroxy double salt (HDS).<sup>3</sup> After that, 3 mmol of 2-methylimidazole (2Im) and 3 mmol of DMOA were added to 15 mL methanol (denoted as solution D), and stirring for 15 min. Then, 2 mL of (Zn, Zn) HDS suspension was added to solution D, and then continue stirring for 10 min. Subsequently, the precipitate was collected by filtered and immersed in ethanol four times at 60 °C for 48 h, and then dried overnight in an oven at 120 °C. The resulting product is denoted as H-ZIF-8. Similarly, hierarchically porous ZIF-8 synthesized with DMDA as template is denoted as H-ZIF-8\_A.

**Table S1** Flory-Huggins interaction parameter  $\chi_{ij}$  between various beads used in this work.

| Bead <sup>a</sup> | Y    | W     | B     | Q    | N      | C    |
|-------------------|------|-------|-------|------|--------|------|
| Y                 | 0.00 | 0.196 | 0.514 | 4.08 | 0.156  | 3.53 |
| W                 |      | 0.00  | 2.74  | 4.50 | -0.498 | 7.28 |
| B                 |      |       | 0.00  | 4.18 | 2.29   | 1.43 |
| Q                 |      |       |       | 0.00 | 4.23   | 13.9 |
| N                 |      |       |       |      | 0.00   | 3.08 |
| C                 |      |       |       |      |        | 0.00 |

**Table S2** Textural properties of hierarchically porous Cu-BTC and conventional Cu-BTC.

| Sample     | $S_{\text{BET}}^a$<br>[m <sup>2</sup> ·g <sup>-1</sup> ] | $S_{\text{micro}}^b$<br>[m <sup>2</sup> ·g <sup>-1</sup> ] | $S_{\text{meso}}^c$ | $V_t^d$<br>[cm <sup>3</sup> ·g <sup>-1</sup> ] | $V_{\text{meso}}^e$<br>[cm <sup>3</sup> ·g <sup>-1</sup> ] | $V_{\text{micro}}^f$<br>[cm <sup>3</sup> ·g <sup>-1</sup> ] |
|------------|----------------------------------------------------------|------------------------------------------------------------|---------------------|------------------------------------------------|------------------------------------------------------------|-------------------------------------------------------------|
| H-Cu-BTC   | 1110                                                     | 926                                                        | 184                 | 0.61                                           | 0.17                                                       | 0.43                                                        |
| H-Cu-BTC_1 | 1347                                                     | 1153                                                       | 194                 | 0.66                                           | 0.12                                                       | 0.54                                                        |
| H-Cu-BTC_5 | 765                                                      | 640                                                        | 125                 | 0.44                                           | 0.14                                                       | 0.30                                                        |
| H-Cu-BTC_A | 563                                                      | 453                                                        | 110                 | 0.59                                           | 0.38                                                       | 0.21                                                        |
| H-ZIF-8    | 1660                                                     | 1456                                                       | 204                 | 1.35                                           | 0.78                                                       | 0.57                                                        |
| H-ZIF-8_1  | 1652                                                     | 1469                                                       | 183                 | 1.24                                           | 0.70                                                       | 0.54                                                        |
| H-ZIF-8_5  | 1617                                                     | 1378                                                       | 239                 | 1.27                                           | 0.74                                                       | 0.53                                                        |
| H-ZIF-8_A  | 1350                                                     | 1098                                                       | 252                 | 1.19                                           | 0.68                                                       | 0.51                                                        |

<sup>a</sup> $S_{\text{BET}}$ : Brunauer–Emmett–Teller (BET) surface area; <sup>b</sup> $S_{\text{micro}}$ : micropore surface area; <sup>c</sup> $S_{\text{meso}}$ : mesopore surface area;

<sup>d</sup> $V_t$ : total pore volume; <sup>e</sup> $V_{\text{meso}}$ : mesopore volume; <sup>f</sup> $V_{\text{micro}}$ : micropore volume.

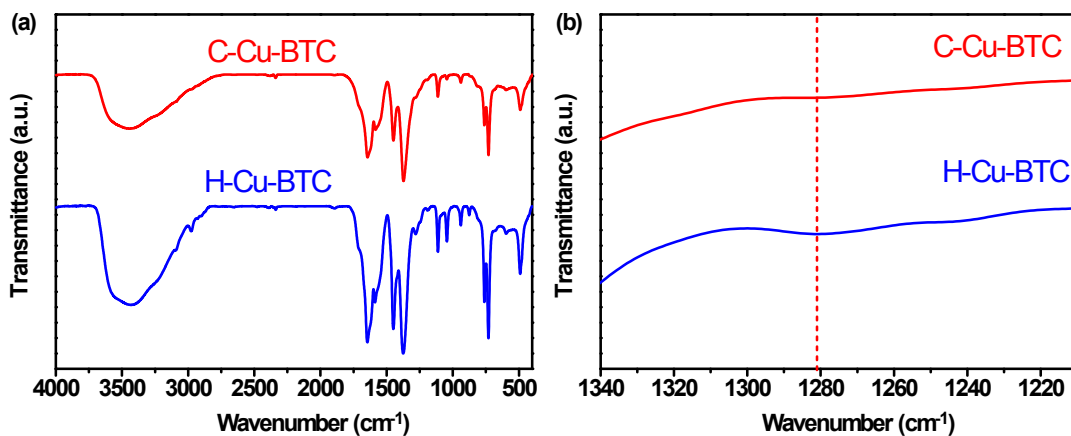

Fig. S1 (a) FTIR spectra of H-Cu-BTC and conventional Cu-BTC (C-Cu-BTC) samples, and (b) FTIR spectra of H-Cu-BTC sample in the narrow region of 1340–1210 cm<sup>-1</sup>.

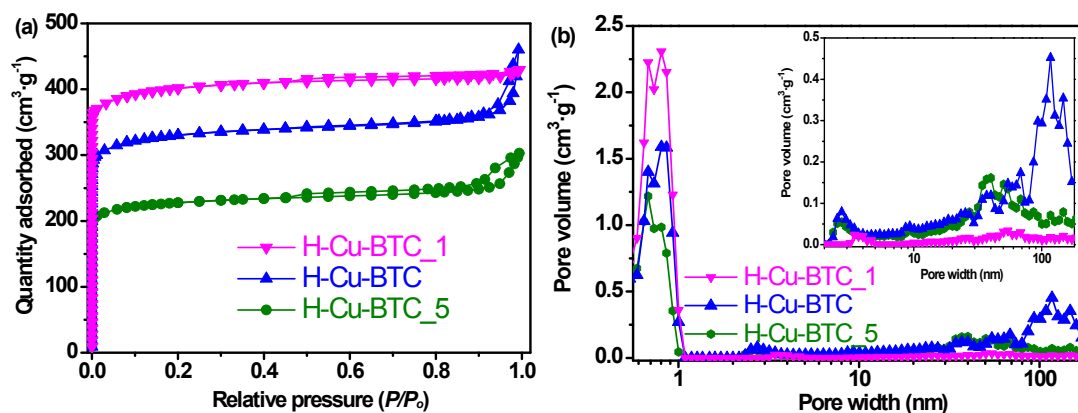

Fig. S2 (a) N<sub>2</sub> adsorption-desorption isotherms and (b) corresponding pore size distributions of H-Cu-BTC, H-Cu-BTC\_1, and H-Cu-BTC\_5 samples.

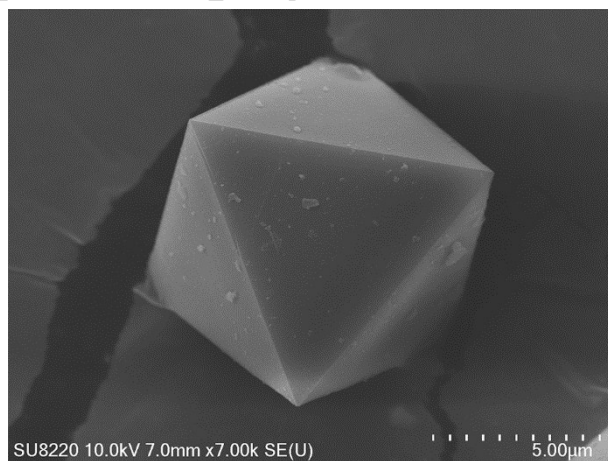

Fig. S3 SEM image of conventional Cu-BTC sample.

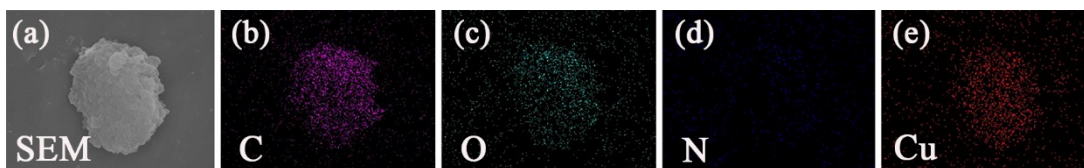

Fig. S4 Elemental distribution maps of H-Cu-BTC: (a) SEM, (b) C, (c) O, (d) N, and (e) Cu.

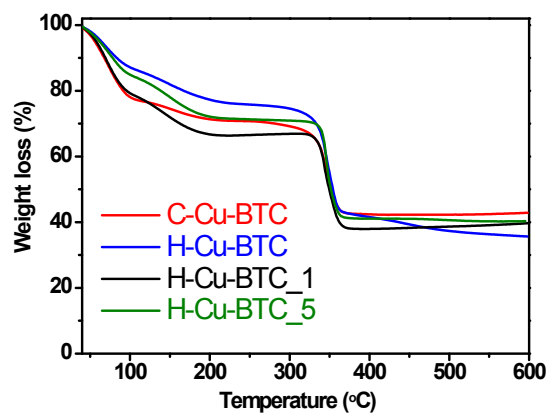

**Fig. S5** Thermogravimetric analysis (TGA) of conventional Cu-BTC (C-Cu-BTC) and H-MOFs.

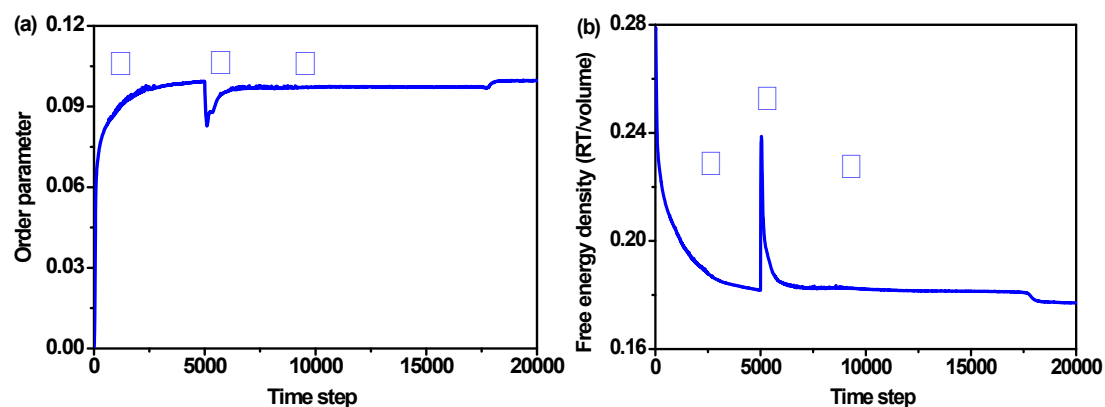

**Fig. S6** (a) Time evolution of order parameter  $P$ , and (b) the free energy density plot with time step during the mesophase formation of hierarchically porous MOFs.

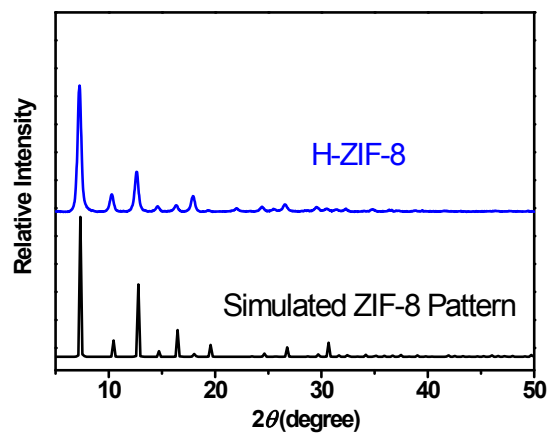

**Fig. S7** Powder XRD patterns of H-ZIF-8 and the simulated ZIF-8 pattern.

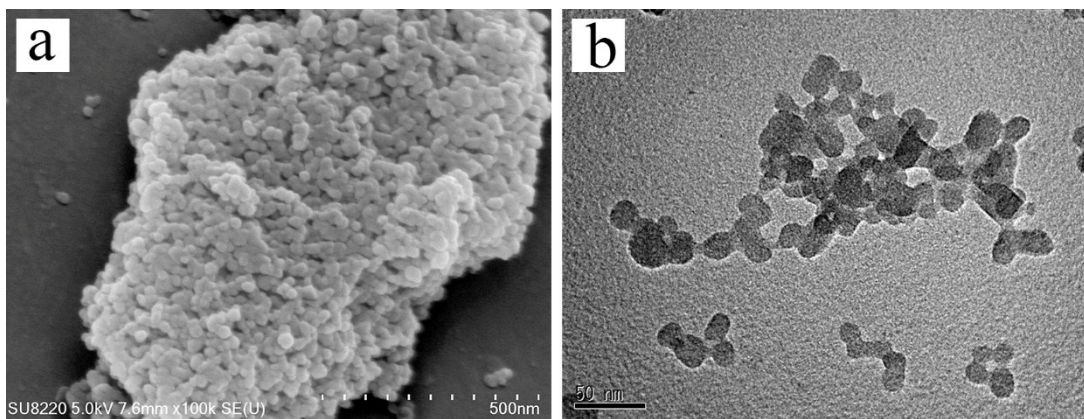

**Fig. S8** (a) SEM and (b) TEM images of H-ZIF-8 sample.

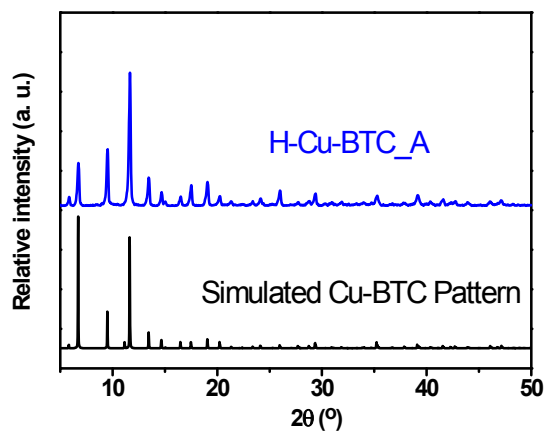

**Fig. S9** Powder XRD patterns of H-Cu-BTC\_A and the simulated Cu-BTC pattern.

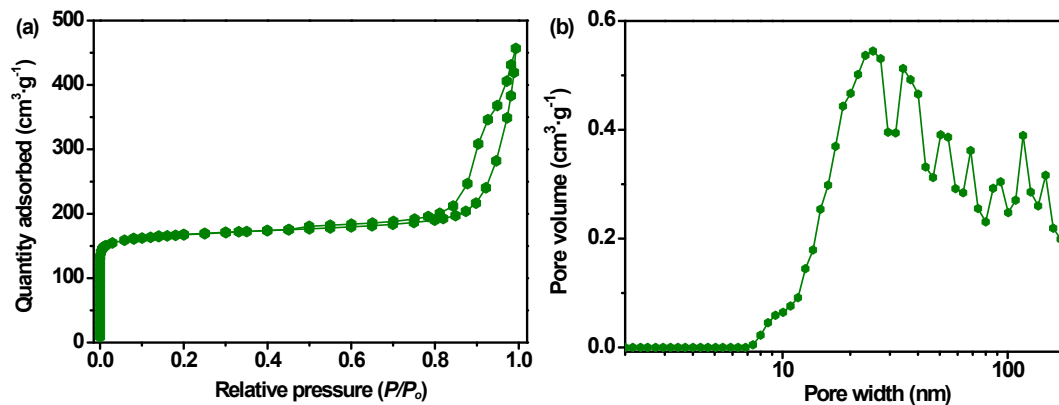

**Fig. S10** (a) N<sub>2</sub> adsorption–desorption isotherms and (b) pore size distributions of H-Cu-BTC\_A.

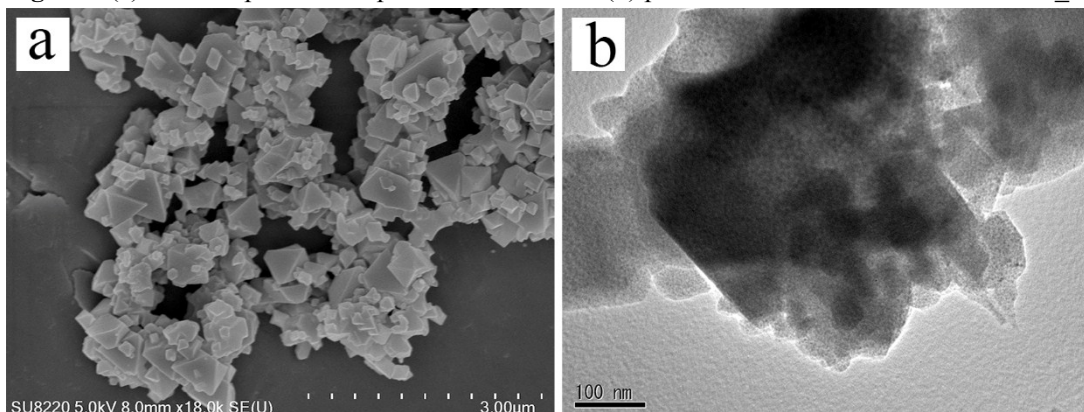

Fig. S11 (a) SEM and (b) TEM images of H-Cu-BTC\_A sample.

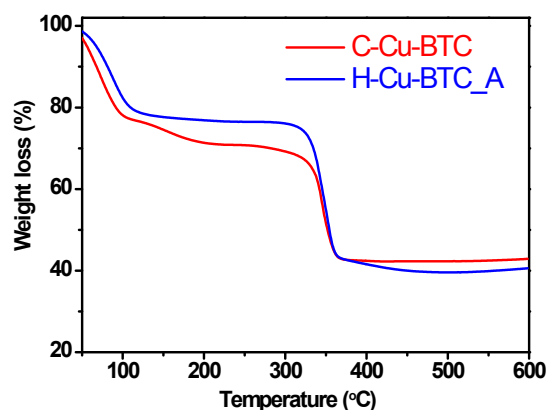

Fig. S12 TGA of H-Cu-BTC-A and C-Cu-BTC samples.

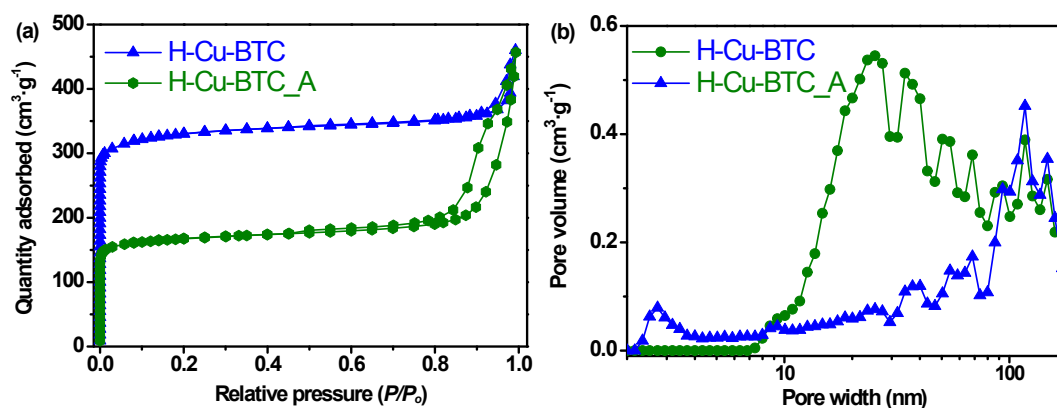

Fig. S13 (a) The N<sub>2</sub> adsorption–desorption isotherms and (b) the corresponding pore size distributions of H-Cu-BTC and H-Cu-BTC\_A samples.

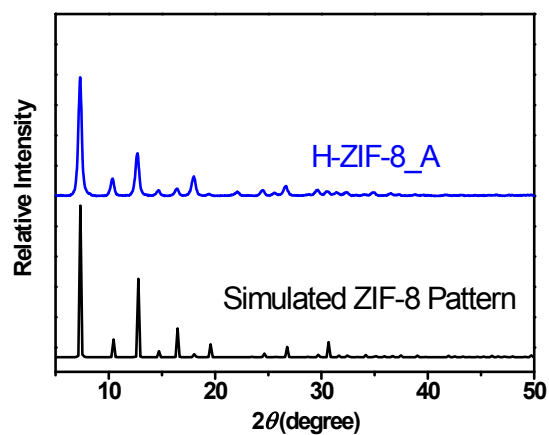

Fig. S14 Powder XRD patterns of H-ZIF-8\_A and the simulated ZIF-8 pattern.

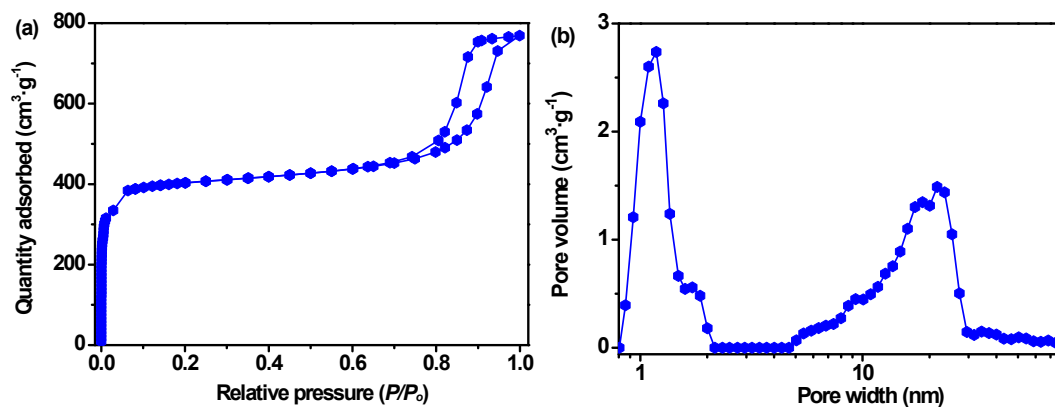

Fig. S15 (a)  $N_2$  adsorption–desorption isotherms and (b) pore size distributions of H-ZIF-8\_A.

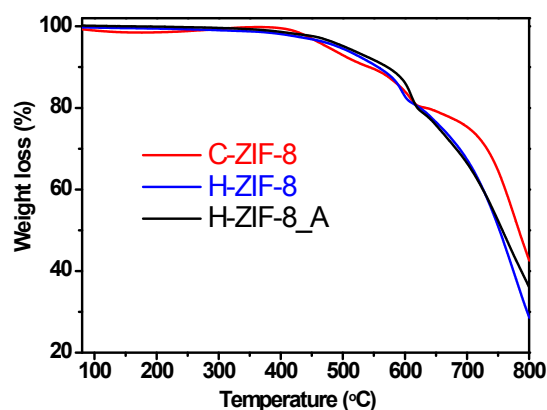

Fig. S16 TGA of H-ZIF-8, H-ZIF-8\_A, and conventional ZIF-8 (C-ZIF-8) samples.

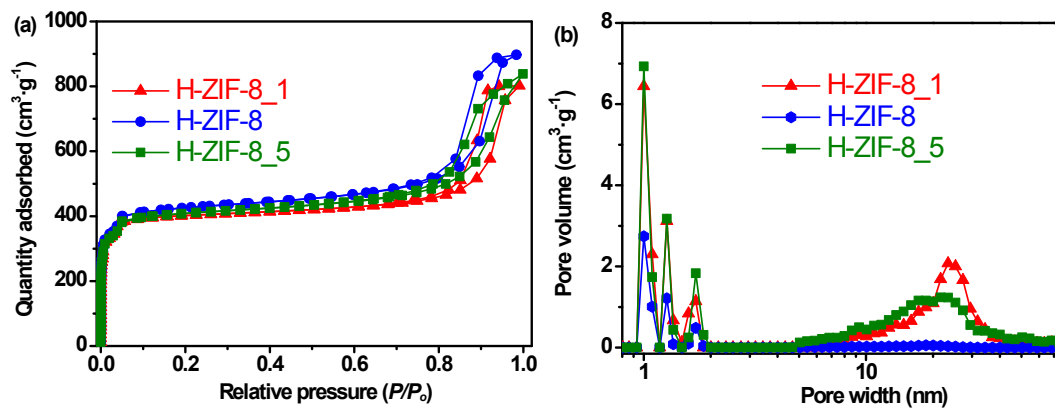

Fig. S17 (a)  $N_2$  adsorption–desorption isotherms and (b) corresponding pore size distributions of H-ZIF-8\_1, H-ZIF-8, and H-ZIF-8\_5 samples.

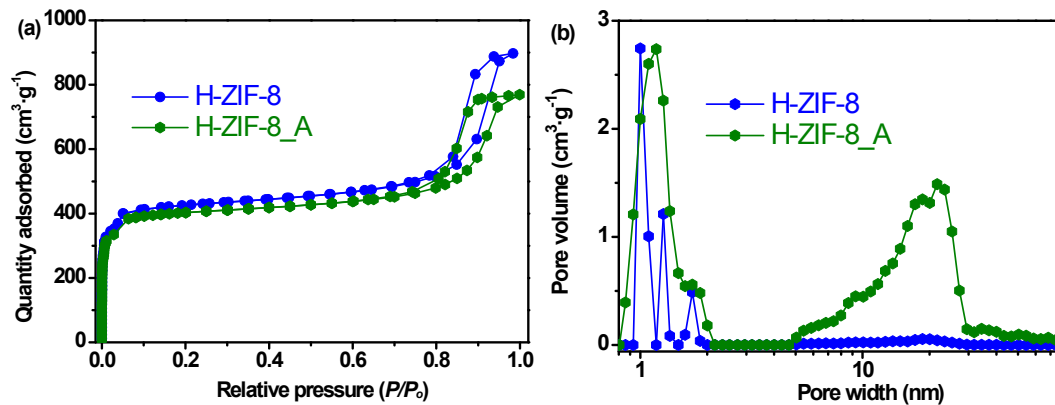

**Fig. S18** (a)  $N_2$  adsorption–desorption isotherms and (b) corresponding pore size distributions of H-ZIF-8 and H-ZIF-8\_A samples.

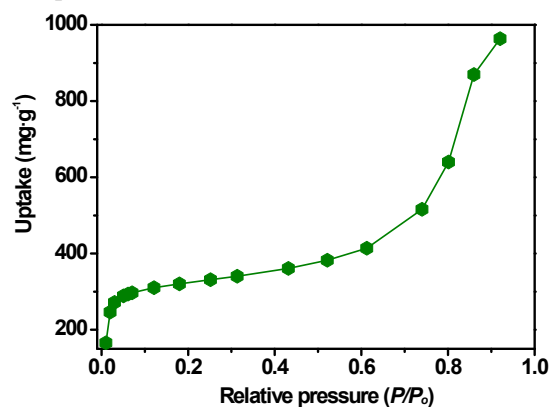

**Fig. S19** Gaseous toluene sorption isotherms at 298K on H-ZIF-8 sample.

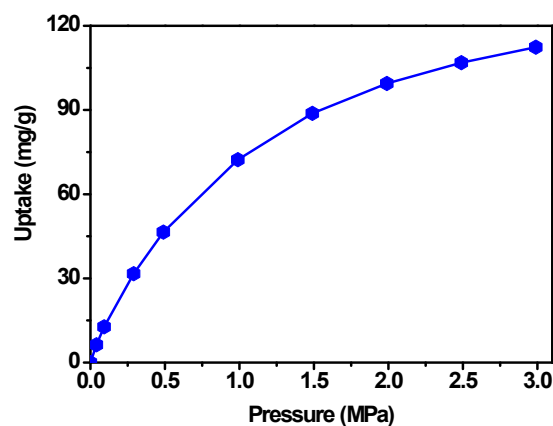

**Fig. S20**  $CH_4$  adsorption curve of H-Cu-BTC\_A sample at 298 K.

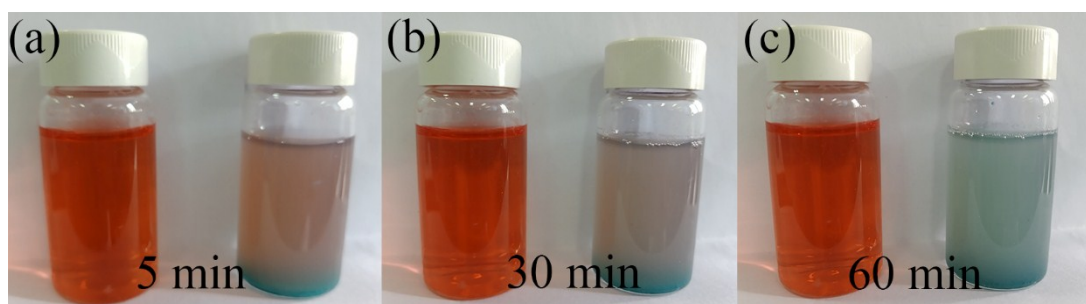

**Fig. S21** Photograph of decoloration process for congo red (CR,  $C_0 = 30 \text{ mg}\cdot\text{L}^{-1}$ ) solution with H-Cu-BTC\_A ( $m = 20 \text{ mg}$ ) adsorbent (right) at different times: (a) 5 min; (b) 30 min; and (c) 60 min.

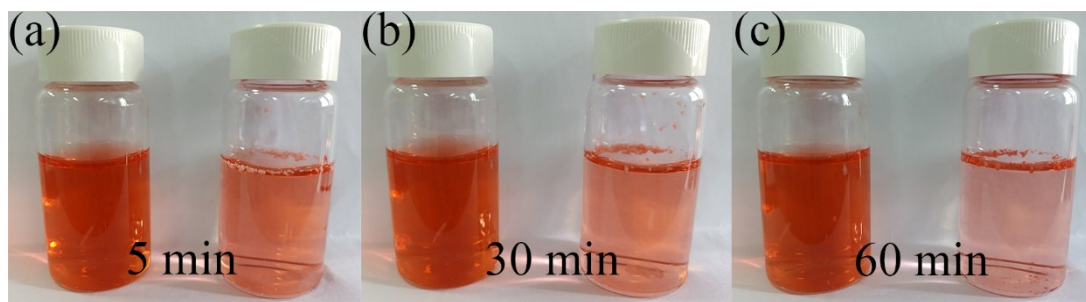

**Fig. S22** Photograph of decoloration process for CR ( $C_0 = 30 \text{ mg}\cdot\text{L}^{-1}$ ) solution with H-ZIF-8 ( $m =$



20 mg) adsorbent (right) at different times: (a) 5 min; (b) 30 min; and (c) 60 min.

### References

1. C. Duan, F. Li, H. Zhang, J. Li, X. Wang and H. Xi, *RSC Adv.*, 2017, 7, 52245-52251.
2. C. Duan, F. Li, L. Li, H. Zhang, X. Wang, J. Xiao and H. Xi, *CrystEngComm*, 2018, 20, 1057-1064.
3. J. Zhao, W. T. Nunn, P. C. Lemaire, Y. Lin, M. D. Dickey, C. J. Oldham, H. J. Walls, G. W. Peterson, M. D. Losego and G. N. Parsons, *J. Am. Chem. Soc.*, 2015, 137, 13756-13759.
